# Supplementary material for: Parapoxvirus Interleukin-10 Homologues Vary in Their Receptor Binding, Anti-Inflammatory, and Stimulatory Activities
Source: MDPI journal article supplement (doi:10.3390/pathogens11050507), 2022-04-24
Supplement: s1 [file s1]

Supplementary Material

# Parapoxvirus Interleukin-10 Homologues Vary in Their Receptor Binding, Anti-Inflammatory, and Stimulatory Activities

Amreen Naqash <sup>1</sup>, Gabriella Stuart <sup>1</sup>, Roslyn Kemp <sup>2</sup>, and Lyn Wise <sup>1,\*</sup>

<sup>1</sup> Department of Pharmacology and Toxicology, School of Biomedical Sciences, University of Otago, Dunedin, New Zealand.

<sup>2</sup> Department of Microbiology and Immunology, School of Biomedical Sciences, University of Otago, Dunedin, New Zealand.

\* Correspondence: lyn.wise@otago.ac.nz; Tel.: +64 3 479 7723

**Table S1.** Human and parapoxvirus IL-10 gene source, loci, length, and cloning details, with protein length and MW estimates after removal of signal peptides

| IL-10 source<br>(Virus strain) | GenBank<br>accession no. | Gene locus<br>(CDS)             | Gene length<br>(NT) | 5' and 3' cloning<br>modifications                                                                                               | Protein length<br>(AA) | Protein MW<br>(kDa) |
|--------------------------------|--------------------------|---------------------------------|---------------------|----------------------------------------------------------------------------------------------------------------------------------|------------------------|---------------------|
| Human                          | NM_000572.3              | (60..596)                       | 537                 | 5'GGATCCCACCATGCACAGC'<br>5'AGATCTGATAATGAACAGTAG-<br>CAGCAGGAACATCAGCAAA-<br>GCATAGAA3' [33]                                    | 160                    | 18.65               |
| ORFV<br>(NZ2)                  | DQ184476.1               | ORFV127<br>(127856..128416)     | 561                 | 5'CGCTCTAGAGCCAC-<br>CATGTCTGAAGAACAAAATTCT3'<br>5'CGCTCTAGATTACTT-<br>GTCATCGTCGTCCTTGTA-<br>TCCATTTTAGTAG-<br>TCATGTATG3' [32] | 161                    | 18.87               |
| BPSV<br>(BV-TX09c1)            | KM875472.1               | BVTX09c1_12<br>(127282..127842) | 561                 | 5'GGATCCCACCATGGCTAAT3'<br>5'AGATCTGATAGTGAACAGTAG-<br>CAGCAGAACATCAGGCAG-<br>TACATTCAGAG3'                                      | 166                    | 19.46               |
| RDPV<br>(HL953)                | NC_025963.1              | SB87_gp125<br>(132854..133396)  | 577                 | 5'GGATCCCACCATGGGCAAA3'<br>5'AGATCTGATAGTGAACAGTAG<br>CAGCAGGAACATC AGAAAGTAC-<br>CACCA3'                                        | 154                    | 17.72               |
| PCPV<br>(F00.120R)             | GQ329669.1               | ORF001.3<br>(2186..2785)        | 607                 | 5'GGATCCCACCATGGCTAAC3'<br>5'ATAGTGAACAGTAGCAGCAG-<br>GAACATCAGACACAGTACAT3'                                                     | 177                    | 20.69               |
| GSPV<br>(AFK76s1)              | NC_035188.1              | CGV03_gp114<br>(120415..121029) | 625                 | 5'GGATCCCACCATGGCCTAC3'<br>5'AGATCTGATGAACAGTAGCAG-<br>CAGGAACATCAGGAAGTAGAA3'                                                   | 178                    | 20.51               |

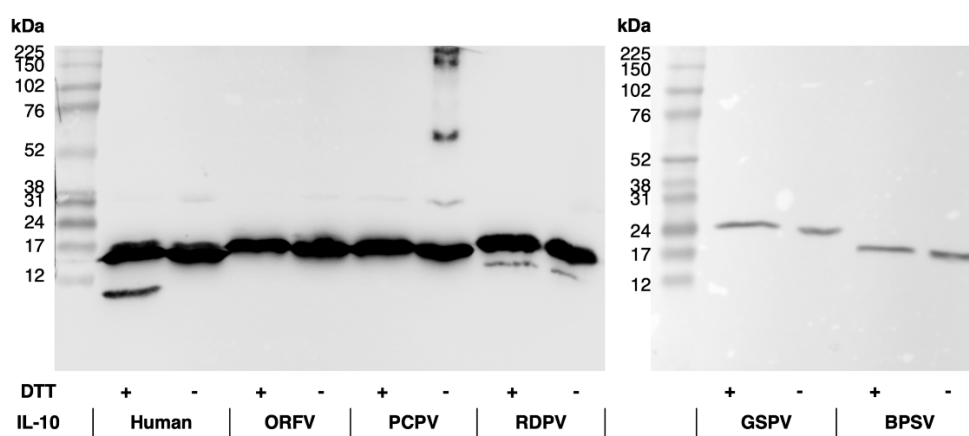

**Figure S1.** Anti-FLAG Western blot showing protein bands corresponding to the human and parapoxvirus IL-10 proteins. Molecular weight markers and the presence or absence of reducing agent (DTT) are indicated.

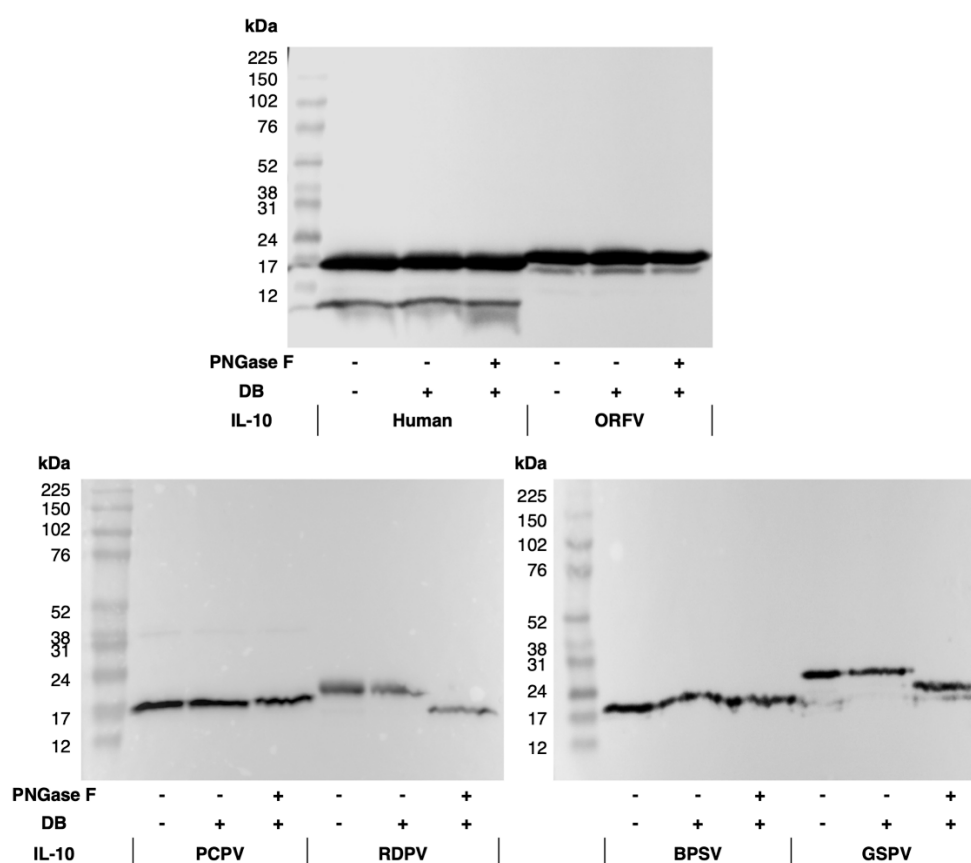

**Figure S2.** Anti-FLAG Western blot showing bands for human and PPV IL-10 proteins following *N*-glycosidase digestion. Molecular weight markers and the presence and absence of denaturing buffer (DB) and PNGase F are indicated.

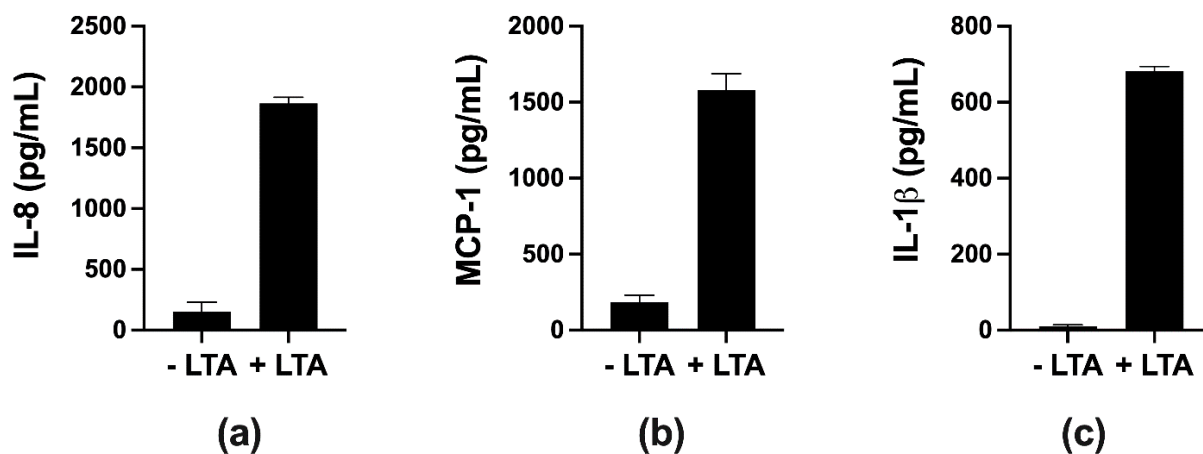

**Figure S3.** Pro-inflammatory chemokine and cytokine production in stimulated human monocytes. THP-1 cells were stimulated with LTA (+LTA, 1 µg.mL<sup>-1</sup>) or left unstimulated (-LTA). After 24, 24, or 48 h incubation, ELISA was used to assess the levels of IL-8 (a), MCP-1 (b), IL-1β (c), respectively. Values represent the mean ± SEM of three independent experiments.

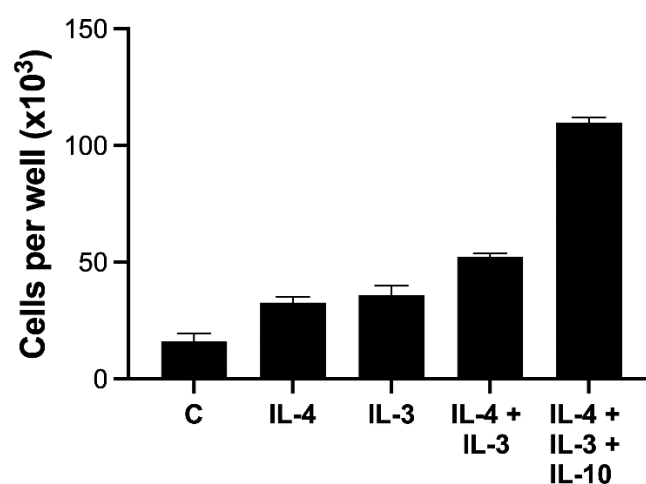

**Figure S4.** Stimulation of murine mast cell proliferation. MC/9 cells were co-stimulated with IL-4-conditioned medium from concanavalin A-activated murine splenocytes (IL-4), IL-3-containing conditioned medium from murine WEHI-3 cells (IL-3) and/or human IL-10 (IL-10). After 48 h incubation, the cell number was assessed through tetrazolium dye reduction and a standard curve. Values representing the mean  $\pm$  SEM of three independent experiments.
